# Supplementary material
Source: PubMed Central journal article supplement (PMC4790773)
Supplement: salc006076.ww2_default.pdf [file salc006076.ww2_default.pdf]

## Web appendix 2: Reasons why referrals were ineligible for invitation

N=1,424 (21% of all referrals) (NB Some referrals had multiple reasons)

| Reason for exclusion                      | Number (%) |
|-------------------------------------------|------------|
| Age under 18 years                        | 180 (13%)  |
| Hearing problems                          | 27 (2%)    |
| Non-English language                      | 27 (2%)    |
| Non-Musculoskeletal problem               | 166 (12%)  |
| Needs domiciliary physiotherapy           | 197 (14%)  |
| Very urgent                               | 376 (26%)  |
| Post-operative                            | 105 (7%)   |
| In trial already                          | 178 (13%)  |
| Problem unsuitable for phone consultation | 135 (9%)   |
| Problem unsuitable for physiotherapy      | 12 (1%)    |
| Patient unsuitable for phone consultation | 41 (3%)    |
| Other                                     | 98 (7%)    |
